# Supplementary material for: Analytical prediction of liquid-gated graphene nanoscroll biosensor performance
Source: Royal Society of Chemistry journal article supplement (doi:10.1039/c3ra47432a), 2014-04-01
Supplement: c3ra47432a1.pdf [file c3ra47432a1.pdf]

## Appendix

$$E_{ZGNS}(k) = \pm t \sqrt{1 + 4 \cos\left(\frac{3k_x a_{cc}}{2}\right) \cdot \cos\left(\frac{2\pi\nu - \varphi}{2n}\right) + 4 \cos^2\left(\frac{2\pi\nu - \varphi}{2n}\right)}$$

**we define**  $\alpha = \frac{2\pi\nu - \varphi}{2n}$  **where**  $\varphi = 0$  for zigzag ZGNS and  $\nu = 1, 2, \dots, 2n$  (even)

IF  $n \in \mathbb{N}$  then,  $\alpha = \frac{2\pi(2n)}{2n} = 2\pi$  **and**  $\cos \alpha = \cos 2\pi = 1$

$$E_{ZGNS}(k) = \pm t \sqrt{1 + 4 \cos\left(\frac{3k_x a_{cc}}{2}\right) + 4}$$

by applying taylor series:  $\cos x = 1 - \frac{x^2}{2!} + \frac{x^4}{4!} \approx 1 - \frac{x^2}{2}$  then we get

$$E_{ZGNS} = \pm t \sqrt{5 + 4 \left( 1 - \frac{\left(\frac{3k_x a_{cc}}{2}\right)^2}{2} \right)}$$

$$E_{ZGNS} = \pm t \sqrt{9 + \frac{5}{2} \cdot \left(\frac{9k_x a_{cc}}{4}\right)}$$

$$E_{ZGNS} = \pm 3t \sqrt{1 + \frac{5}{8} k_x^2 a_{cc}^2}$$
